# Supplementary material for: Talking to chromatin: post-translational modulation of polycomb group function
Source: PubMed Central journal article supplement (PMC2745409; doi:10.1186/1756-8935-2-10), 2009-09-01
Supplement: 1756-8935-2-10-S1.pdf [file 1756-8935-2-10-S1.pdf]

**Supplemental Table 1: Prediction of human Polycomb Sumoylation Sites**

| Complex | Drosophila | Name    | Accession Number | Total nr AA | Position         | Peptide       | Type          |               |                 |         |               |
|---------|------------|---------|------------------|-------------|------------------|---------------|---------------|---------------|-----------------|---------|---------------|
| PRC2    | E(z)       | EZH1    | Q92800           | 747         | 20               | RKVKSEY       | Ψ-K-X-E       |               |                 |         |               |
|         |            |         |                  |             | 140              | DEVKEED       | Ψ-K-X-E       |               |                 |         |               |
|         |            |         |                  |             | 327              | KEIKIEP       | Ψ-K-X-E       |               |                 |         |               |
|         | Esc        | EZH2    | Q15910           | 746         | 20               | KRVKSEY       | Ψ-K-X-E       |               |                 |         |               |
|         |            |         |                  |             | 19               | PAAKKQK       | Non-consensus |               |                 |         |               |
|         |            |         |                  |             | Su(z)12          | SUZ12         | Q15022        | 739           | 75 <sup>#</sup> | KKPKMEH | Ψ-K-X-E       |
| 145     | EKMKGEQ    | Ψ-K-X-E |                  |             |                  |               |               |               |                 |         |               |
|         |            |         |                  | 735         | KQSKKQK          | Non-consensus |               |               |                 |         |               |
| PRC1    | Pc         | CBX2    | Q14781           | 532         | 153              | LVAKPEL       | Ψ-K-X-E       |               |                 |         |               |
|         |            |         |                  |             | 410              | DTSKSEK       | Non-consensus |               |                 |         |               |
|         |            |         |                  |             | 492 <sup>#</sup> | LQVKPET       | Ψ-K-X-E       |               |                 |         |               |
|         |            |         |                  |             |                  | CBX4          | O00257        | 558           | -               | -       | -             |
|         |            |         |                  |             |                  | CBX6          | O95503        | 412           | -               | -       | -             |
|         |            |         |                  |             |                  | CBX7          | O95931        | 251           | -               | -       | -             |
|         | Ph         | PHC1    | P78364           | 1004        | 799              | NLLKCEY       | Ψ-K-X-E       |               |                 |         |               |
|         |            |         |                  |             | 976              | LLLKEEH       | Ψ-K-X-E       |               |                 |         |               |
|         |            |         |                  |             | 641              | LKLKCEL       | Ψ-K-X-E       |               |                 |         |               |
|         |            |         |                  |             | 784              | ELLKCEF       | Ψ-K-X-E       |               |                 |         |               |
|         |            |         |                  |             | 981              | NSLKES*       | Non-consensus |               |                 |         |               |
|         |            |         |                  |             |                  | SCe/dRing     | RING1         | Q06587        | 406             | -       | -             |
|         |            |         | RNF2             | Q99496      | 336              | 336           | KEHK***       | Non-consensus |                 |         |               |
|         | Psc        | BMI1    | P35226           | 326         | 88               | GLFKNEM       | Ψ-K-X-E       |               |                 |         |               |
|         |            |         |                  |             | 88               | GLFKDEM       | Ψ-K-X-E       |               |                 |         |               |
|         | PhoRC      | Pho     | YY1              | P25490      | 414              | -             | -             |               |                 |         |               |
|         | Other      | Psc     | PCGF1            | Q9BSM1      | 247              | -             | -             | -             |                 |         |               |
|         |            |         |                  |             |                  | PCGF6         | Q9BYE7        | 350           | 16              | GAAKTEG | Ψ-K-X-E       |
| Scm     |            | SCMH1   | Q96GD3           | 660         | 63               | ISMKLEA       | Ψ-K-X-E       |               |                 |         |               |
|         |            |         |                  |             | 172              | MGMKLEA       | Ψ-K-X-E       |               |                 |         |               |
|         |            |         |                  |             |                  | SCML1         | Q9UN30        | 208           | -               | -       |               |
|         |            |         |                  |             |                  | SCML2         | Q9UQR0        | 700           | 13              | MDVKKEN | Ψ-K-X-E       |
|         |            |         |                  |             |                  |               |               |               | 68              | VGMKLEA | Ψ-K-X-E       |
|         |            |         |                  |             |                  |               |               |               | 161             | TLFKKEP | Ψ-K-X-E       |
|         |            |         |                  |             |                  |               |               |               | 177             | VGMKLEA | Ψ-K-X-E       |
|         |            |         |                  |             |                  |               |               |               | 252             | NIAKTES | Ψ-K-X-E       |
|         |            |         |                  |             |                  |               |               |               | 487             | QSAKEDV | Non-consensus |
|         |            |         |                  |             |                  |               |               |               | 536             | AIPKEEN | Ψ-K-X-E       |
|         | RYBP       | Q8N488  | 228              | 77          | PPPKKEK          | Ψ-K-X-E       |               |               |                 |         |               |
|         |            |         |                  | 80          | KKEKKEK          | Non-consensus |               |               |                 |         |               |
|         |            |         |                  | 83          | KKEKVEK          | Non-consensus |               |               |                 |         |               |
|         |            |         |                  | 86          | KVEKQDK          | Non-consensus |               |               |                 |         |               |

Predictions were made by using SUMOsp 2.0, a site-specific predictor of sumoylation sites [1].

<sup>#</sup>: experimentally verified sumoylation sites (see Table 2 in main text).

## References

1. Ren J, Gao X, Jin C, Zhu M, Wang X, Shaw A, Wen L, Yao X, Xue Y: **Systematic study of protein sumoylation: Development of a site-specific predictor of SUMOsp 2.0.** *Proteomics* 2009.
