# Supplementary material for: Talking to chromatin: post-translational modulation of polycomb group function
Source: PubMed Central journal article supplement (PMC2745409; doi:10.1186/1756-8935-2-10), 2009-09-01
Supplement: 1756-8935-2-10-S2.pdf [file 1756-8935-2-10-S2.pdf]

**Supplemental Table 2: Mouse Polycomb Phosphorylation Sites**

| Complex | Drosophila | Name  | Alternative symbol | Accession number | Total nr AA | Phosphosite                  | Conservation in Humans        | Ref                          |     |
|---------|------------|-------|--------------------|------------------|-------------|------------------------------|-------------------------------|------------------------------|-----|
| PRC2    | E(z)       | EZH1  |                    | P70351           | 747         | -                            |                               |                              |     |
|         |            | EZH2  |                    | Q61188           | 746         | T487                         | T487*                         | [1]                          |     |
|         | Esc        | EED   |                    | Q921E6           | 441         | -                            |                               |                              |     |
|         | Su(z)12    | SUZ12 |                    | Q80U70           | 741         | S548<br>S585                 | S546*<br>S583*                | [1]<br>[1]                   |     |
| PRC1    | Pc         | CBX2  | m33                | P30658           | 519         | -                            |                               |                              |     |
|         |            | CBX4  | mPc2               | O55187           | 551         | -                            |                               |                              |     |
|         |            | CBX6  |                    | Q9DBY5           | 414         | -                            |                               |                              |     |
|         |            | CBX7  |                    | Q8VDS3           | 158         | -                            |                               |                              |     |
|         |            | CBX8  | mPc3               | Q9QXV1           | 362         | S229<br>S238<br>S284<br>T286 | S256*<br>S265*<br>S311*<br>NC | [2]<br>[2]<br>[2]<br>[2] [3] |     |
|         | Ph         | PHC1  | mPh1/Edr1/Rae28    | Q64028           | 1012        | -                            |                               |                              |     |
|         |            | PHC2  | mPh2/Edr2          | Q9QWH1           | 850         | -                            |                               |                              |     |
|         |            | PHC3  | mPh3               | Q8CHP6           | 981         | S231                         | NC                            | [2]                          |     |
|         |            |       |                    |                  |             | S269                         | S272                          | [3]                          |     |
|         |            |       |                    |                  |             | T607                         | T609*                         | [2] [3]                      |     |
|         |            |       |                    |                  |             | S612                         | S614*                         | [2] [3]                      |     |
|         | S614       | S616* | [2] [3]            |                  |             |                              |                               |                              |     |
|         | Sce/dRing  | RING1 | Ring1A             | O35730           | 406         | -                            |                               |                              |     |
|         |            | RNF2  | Ring1b             | Q9CQJ4           | 336         | -                            |                               |                              |     |
|         | Psc        | BMI1  |                    | P25916           | 324         | S110                         | S110                          | #                            |     |
|         |            |       |                    |                  |             | S249                         | S251*                         | [3], #                       |     |
|         |            |       |                    |                  |             | S251                         | S253*                         | [3]                          |     |
|         |            |       |                    |                  |             | S253                         | S255*                         | [3]                          |     |
|         |            |       |                    |                  |             | S314                         | S316                          | #                            |     |
|         |            | PCGF2 | Mel18              |                  | P23798      | 342                          | S110                          | S110                         | [4] |
|         |            |       |                    |                  |             |                              | S132                          | S132                         | [4] |
|         |            |       |                    |                  |             |                              | S254                          | S254                         | [4] |
|         |            |       |                    |                  |             |                              | S258                          | S258                         | [4] |
| S260    |            |       |                    |                  |             |                              | S260                          | [4]                          |     |
| S265    |            |       |                    |                  |             |                              | S265                          | [4]                          |     |
| S278    |            |       |                    |                  |             |                              | S278                          | [4]                          |     |
| T281    |            |       |                    |                  |             |                              | T281                          | [4]                          |     |
| S286    |            |       |                    |                  |             |                              | S286                          | [4]                          |     |
| S299    | S299       | [4]   |                    |                  |             |                              |                               |                              |     |
| PhoRC   | Pho        | YY1   |                    | Q00899           | 414         | S120                         | S118*                         | [1]                          |     |
|         |            |       |                    |                  |             | S247                         | S247*                         | [1] [3]                      |     |
| Other   | Psc        | PCGF1 | Nspc1              | Q8R023           | 259         | -                            |                               |                              |     |
|         |            | PCGF6 | Mblr/Rnf134        | Q99NA9           | 353         | S118                         | S115                          | [1]                          |     |
|         | Scm        | SCMH1 |                    | Q8K214           | 706         | -                            |                               |                              |     |
|         |            | Rybp  |                    | Q8CCI5           | 228         | S227                         | S227                          | [1]                          |     |

(\*): sites that were detected as phosphorylation sites in human cells as well; AA: Amino Acid; NC: non-conserved; # unpublished results (HN,JD,JWV)

#### References

- Li H, Xing X, Ding G, Li Q, Wang C, Xie L, Zeng R, Li Y: **SysPTM - a systematic resource for proteomic research of post-translational modifications.** *Mol Cell Proteomics* 2009.
- Villen J, Beausoleil SA, Gerber SA, Gygi SP: **Large-scale phosphorylation analysis of mouse liver.** *Proc Natl Acad Sci U S A* 2007, **104**:1488-1493.
- Zanivan S, Gnad F, Wickstrom SA, Geiger T, Macek B, Cox J, Fassler R, Mann M: **Solid tumor proteome and phosphoproteome analysis by high resolution mass spectrometry.** *J Proteome Res* 2008, **7**:5314-5326.
- Elderkin S, Maertens GN, Endoh M, Mallery DL, Morrice N, Koseki H, Peters G, Brockdorff N, Hiom K: **A phosphorylated form of Mel-18 targets the Ring1B histone H2A ubiquitin ligase to chromatin.** *Mol Cell* 2007, **28**:107-120.
